# Supplementary material for: Diversity of NC10 bacteria associated with sediments of submerged Potamogeton crispus (Alismatales: Potmogetonaceae)
Source: PeerJ. 2018 Dec 4;6:e6041. doi: 10.7717/peerj.6041 (PMC6284450; doi:10.7717/peerj.6041)
Supplement: Supplemental Information 1 [file peerj-06-6041-s001.xlsx]

## Sheet: Sheet1
Physical and chemical properties of sediment and interstitial water before the cultivation of submerged plants
	parallel samples	Interstitial water		Sediment
		Nitrate nitrogen	Ammonium nitrogen	Organic matter	Water content	pH	Total nitrogen	Total phosphorus
		mg/L	mg/L	g kg-1	%		g kg-1	g kg-1
	1	0.17242	5.73325	8.91308	72.28	6.92	0.44	0.45
	2	0.29968	3.173	7.96488	71.3017	7.07	0.56	0.5
	3	0.19363	4.251	9.67164	73.8736	6.98	0.51	0.41
