# Supplementary material for: Diversity of NC10 bacteria associated with sediments of submerged Potamogeton crispus (Alismatales: Potmogetonaceae)
Source: PeerJ. 2018 Dec 4;6:e6041. doi: 10.7717/peerj.6041 (PMC6284450; doi:10.7717/peerj.6041)
Supplement: Supplemental Information 2 [file peerj-06-6041-s002.xlsx]

## Sheet: Sheet1
Physical and chemical properties of sediments and interstitial water in four culture periods
	April 2th sampling / 0 mg (slow-release urea) kg-1 (sediment)					April 16th sampling / 0 mg (slow-release urea) kg-1 (sediment)					April 30th sampling 0 mg (slow-release urea) kg-1 (sediment)					May 14th sampling 0 mg (slow-release urea) kg-1 (sediment)
	Rhizosphere distance	Parallel samples	Interstitial water			Rhizosphere distance	Parallel samples	Interstitial water			Rhizosphere distance	Parallel samples	Interstitial water			Rhizosphere distance	Parallel samples	Interstitial water
			Nitrate nitrogen	Ammonium nitrogen				Nitrate nitrogen	Ammonium nitrogen				Nitrate nitrogen	Ammonium nitrogen				Nitrate nitrogen	Ammonium nitrogen
			mg/L	mg/L				mg/L	mg/L				mg/L	mg/L				mg/L	mg/L
	R	R-1	0.29968	0.76848		R	R-1	0.67758	1.80038		R	R-1	0.25304	0.59662		R	R-1	0.43206	0.86866
		R-2	0.46936	1.11176			R-2	0.55824	1.34156			R-2	0.13036	0.5442			R-2	0.2667	2.43872
		R-3	0.17242	1.06272			R-3	0.24	1.03568			R-3	0.2592	2.16922			R-3	0.76278	1.62662
	N1	N1-1	6.193	0.34325		N1	N1-1	1.32967	1.3549		N1	N1-1	0.196133	0.8863		N1	N1-1	-	5.9796
		N1-2	3.212	2.76875			N1-2	1.21917	1.1			N1-2	0.7355	-			N1-2	-	2.4484
		N1-3	5.103	1.8255			N1-3	0.887667	1.3549			N1-3	0.5876	-			N1-3	-	1.3656
	N2	N2-1	4.604	0.61275		N2	N2-1	1.19604	1.8647		N2	N2-1	0.196133	-		N2	N2-1	-	1.3656
		N2-2	3.444	1.2865			N2-2	1.11648	1.3549			N2-2	0.584533	-			N2-2	-	2.1777
		N2-3	1.356	2.095			N2-3	0.8778	1.3549			N2-3	1.40263	1.2484			N2-3	-	1.3656
	N3	N3-1	4.676	0.478		N3	N3-1	0.854786	4.1588		N3	N3-1	-	-		N3	N3-1	-	0.8242
		N3-2	4.604	1.69075			N3-2	1.06789	2.8843			N3-2	-	-			N3-2	-	2.4484
		N3-3	3.14	3.512			N3-3	0.925821	2.3745			N3-3	0.492846	0.6242			N3-3	-	1.3656
	N4	N4-1	1.82	0.34325		N4	N4-1	0.998167	2.8843		N4	N4-1	0.196133	-		N4	N4-1	-	1.3656
		N4-2	1.027	1.2865			N4-2	0.666667	15.562			N4-2	0.6826	1.4105			N4-2	-	3.8019
		N4-3	1.221	2.49925			N4-3	0.887667	1.3549			N4-3	0.6407	1.2484			N4-3	-	1.3656
	N5	N5-1	1.356	1.556		N5	N5-1	1.10867	5.1784		N5	N5-1	0.5884	-		N5	N5-1	-	1.8208
		N5-2	2.516	2.22975			N5-2	1.32967	1.6098			N5-2	0.0666667	0.3621			N5-2	-	2.9036
		N5-3	0.892	3.03825			N5-3	0.777167	9.7666			N5-3	0.1062	2.721			N5-3	-	1.907
	Non	Non-1	0.23605	0.76848		Non	Non-1	0.67758	1.90234		Non	Non-1	0.33072	0.70146		Non	Non-1	0.43206	3.1622
		Non-2	0.13	0.57232			Non-2	0.71736	1.44352			Non-2	0.42572	0.8063			Non-2	0.55608	1.57248
		Non-3	0.15121	1.30792			Non-3	0.59802	1.59646			Non-3	0.23572	1.74986			Non-3	0.43206	1.35592
	April 2th sampling / 400 mg (slow-release urea) kg-1 (sediment)					April 16th sampling / 400 mg (slow-release urea) kg-1 (sediment)					April 30th sampling 400 mg (slow-release urea) kg-1 (sediment)					May 14th sampling 400 mg (slow-release urea) kg-1 (sediment)
	Rhizosphere distance	Parallel samples	Interstitial water			Rhizosphere distance	Parallel samples	Interstitial water			Rhizosphere distance	Parallel samples	Interstitial water			Rhizosphere distance	Parallel samples	Interstitial water
			Nitrate nitrogen	Ammonium nitrogen				Nitrate nitrogen	Ammonium nitrogen				Nitrate nitrogen	Ammonium nitrogen				Nitrate nitrogen	Ammonium nitrogen
			mg/L	mg/L				mg/L	mg/L				mg/L	mg/L				mg/L	mg/L
	R	R-1	0.15121	14.0312		R	R-1	0.39912	14.0356		R	R-1	0.13652	14.121		R	R-1	0.43206	12.0756
		R-2	0.32764	13.7043			R-2	0.55824	19.2355			R-2	0.16582	11.9718			R-2	0.10134	12.7253
		R-3	0.388375	9.20893			R-3	0.47868	17.8591			R-3	0.10722	11.7621			R-3	0.30804	11.9674
	N1	N1-1	2.98	14.8963		N1	N1-1	0.8778	2.3745		N1	N1-1	0.4	14.7776		N1	N1-1	-	11.1108
		N1-2	4.604	15.57			N1-2	0.63912	20.4724			N1-2	0.908533	10.3219			N1-2	-	12.1936
		N1-3	2.516	14.0878			N1-3	1.03692	21.2371			N1-3	0.1593	11.6324			N1-3	-	11.9229
	N2	N2-1	2.748	17.726		N2	N2-1	1.2756	21.492		N2	N2-1	0.5876	13.7292		N2	N2-1	-	13.0057
		N2-2	2.428	17.3218			N2-2	1.35516	17.9234			N2-2	0.5876	11.3703			N2-2	-	13.5471
		N2-3	3.416	19.6125			N2-3	0.95736	29.2194			N2-3	0.748067	12.6808			N2-3	-	13.0057
	N3	N3-1	1.82	11.258		N3	N3-1	1.24725	25.3155		N3	N3-1	0.748067	12.9429		N3	N3-1	-	13.5471
		N3-2	1.588	21.0948			N3-2	1.49587	20.9822			N3-2	0.908533	13.205			N3-2	-	13.5471
		N3-3	2.052	15.57			N3-3	1.37156	18.4332			N3-3	0.748067	13.9913			N3-3	-	12.735
	N4	N4-1	1.356	13.6835		N4	N4-1	1.21917	20.9822		N4	N4-1	0.5876	14.5155		N4	N4-1	-	15.7248
		N4-2	0.108	15.4353			N4-2	0.887667	23.5312			N4-2	1.38993	13.205			N4-2	-	14.0885
		N4-3	1.56	19.7473			N4-3	0.777167	25.3155			N4-3	0.678	13.4671			N4-3	-	12.1936
	N5	N5-1	5.068	18.5345		N5	N5-1	0.998167	31.688		N5	N5-1	0.405683	15.3018		N5	N5-1	-	12.1936
		N5-2	5.807	15.031			N5-2	1.10867	20.4724			N5-2	0.307692	11.3703			N5-2	-	12.4643
		N5-3	6.417	14.492			N5-3	0.887667	24.2959			N5-3	0.388863	15.3018			N5-3	-	12.1936
	Non	Non-1	0.13	18.2813		Non	Non-1	0.79692	18.8277		Non	Non-1	0.48608	12.2339		Non	Non-1	0.18402	10.0199
		Non-2	0.19363	15.5024			Non-2	0.4389	29.1927			Non-2	0.29188	11.2379			Non-2	0.34938	12.1839
		Non-3	0.17242	11.5792			Non-3	0.59802	16.7885			Non-3	0.44724	9.40318			Non-3	0.39072	9.96418
	April 2th sampling / 600 mg (slow-release urea) kg-1 (sediment)					April 16th sampling / 600 mg (slow-release urea) kg-1 (sediment)					April 30th sampling 600 mg (slow-release urea) kg-1 (sediment)					May 14th sampling 600 mg (slow-release urea) kg-1 (sediment)
	Rhizosphere distance	Parallel samples	Interstitial water			Rhizosphere distance	Parallel samples	Interstitial water			Rhizosphere distance	Parallel samples	Interstitial water			Rhizosphere distance	Parallel samples	Interstitial water
			Nitrate nitrogen	Ammonium nitrogen				Nitrate nitrogen	Ammonium nitrogen				Nitrate nitrogen	Ammonium nitrogen				Nitrate nitrogen	Ammonium nitrogen
			mg/L	mg/L				mg/L	mg/L				mg/L	mg/L				mg/L	mg/L
	R	R-1	0.40573	19.9977		R	R-1	0.35934	18.2946		R	R-1	0.20686	11.7621		R	R-1	-	13.0502
		R-2	0.16118	10.5984			R-2	0.39912	29.0854			R-2	0.19536	13.9637			R-2	-	13.5374
		R-3	0.33213	18.6083			R-3	0.35934	29.3403			R-3	0.12386	14.3831			R-3	-	11.2094
	N1	N1-1	3.908	17.4914		N1	N1-1	1.32914	30.4135		N1	N1-1	0.199125	14.5155		N1	N1-1	-	10.8401
		N1-2	2.9574	9.2772			N1-2	1.045	26.8449			N1-2	0.748067	18.1849			N1-2	-	13.0178
		N1-3	3.4666	11.8518			N1-3	0.495057	31.4331			N1-3	0.307692	15.3018			N1-3	-	18.4318
	N2	N2-1	5.3	17.001		N2	N2-1	1.42386	31.688		N2	N2-1	0.748067	16.6123		N2	N2-1	-	11.1108
		N2-2	5.496	23.2536			N2-2	1.51857	25.5704			N2-2	0.748067	17.3986			N2-2	-	10.5694
		N2-3	6.148	10.871			N2-3	1.23443	32.1978			N2-3	0.5876	16.6123			N2-3	-	14.9006
	N3	N3-1	2.98	13.8134		N3	N3-1	1.86881	36.5311		N3	N3-1	0.492846	15.0397		N3	N3-1	-	11.3815
		N3-2	4.14	19.453			N3-2	1.99312	20.4724			N3-2	0.1062	17.3986			N3-2	-	13.0057
		N3-3	1.356	6.8252			N3-3	1.62019	28.6292			N3-3	0.8	21.168			N3-3	-	13.0057
	N4	N4-1	3.212	13.8134		N4	N4-1	1.55067	30.9233		N4	N4-1	0.800875	17.6607		N4	N4-1	-	10.8401
		N4-2	1.124	15.162			N4-2	1.32967	33.2174			N4-2	0.748067	20.5438			N4-2	-	11.9229
		N4-3	1.588	20.4338			N4-3	0.777167	34.7468			N4-3	0.1	18.0228			N4-3	-	14.6299
	N5	N5-1	2.98	15.162		N5	N5-1	1.2756	24.041		N5	N5-1	0.533917	16.6123		N5	N5-1	-	10.8401
		N5-2	2.845	15.8976			N5-2	1.19604	29.6488			N5-2	0.427133	20.0196			N5-2	-	11.6522
		N5-3	3.115	13.323			N5-3	1.12709	32.1978			N5-3	0.973231	17.9228			N5-3	-	17.349
	Non	Non-1	0.3421	17.464		Non	Non-1	0.95604	27.9808		Non	Non-1	0.29952	11.0806		Non	Non-1	0.643425	9.91004
		Non-2	0.15121	22.8584			Non-2	0.16044	15.1509			Non-2	0.17536	17.5807			Non-2	0.325566	10.3432
		Non-3	0.40573	27.0268			Non-3	0.47868	19.824			Non-3	0.28424	10.0322			Non-3	0.520216	10.8304
	- indicating that nitrate nitrogen is lower than the detection limit of 0.08 mg/L
	* representing unmeasured values
In situ measurement of dissolved oxygen value in four culture period (μmol / L)
	April 2th sampling / 0 mg (slow-release urea) kg-1 (sediment)							April 16th sampling / 0 mg (slow-release urea) kg-1 (sediment)							April 30th sampling / 0 mg (slow-release urea) kg-1 (sediment)							May 14th sampling 0 mg (slow-release urea) kg-1 (sediment)
	Rhizosphere distance / mm Depth / μm	N1	N2	N3	N4	N5		Rhizosphere distance / mm Depth / μm	N1	N2	N3	N4	N5		Rhizosphere distance / mm Depth / μm	N1	N2	N3	N4	N5		Rhizosphere distance / mm Depth / μm	N1	N2	N3	N4	N5
	0	266.49	78.505	112.708	101.24	55.6482		0	314.841	171.576	173.374	213.287	229.164		0	186.516	216.059	214.001	205.265	145.888		0	163.365	197.287	182.163	176.307	195.51
	1000	267.563	91.4333	130.128	114.296	70.6151		1000	313.867	119.978	172.142	201.378	225.093		1000	187.585	209.704	210.854	202.706	149.228		1000	162.526	197.974	167.77	181.331	194.411
	2000	265.899	104.816	144.596	122.496	91.5528		2000	312.254	113.06	171.631	186.222	223.689		2000	189.132	207.203	211.432	201.451	153.017		2000	164.982	197.85	177.242	183.1	193.378
	3000	265.604	113.443	156.324	134.172	111.827		3000	305.915	99.4682	170.355	171.485	224.106		3000	190.93	208.498	211.236	202.549	160.058		3000	165.47	195.809	183.841	183.89	191.726
	4000	262.09	125.036	166.004	143.779	124.618		4000	302.365	93.3619	166.005	150.219	219.574		4000	191.719	210.633	208.197	204.402	167.304		4000	167.458	194.054	187.775	184.436	190.693
	5000	258.414	131.687	173.557	152.695	135.18		5000	292.275	84.4527	160.146	128.357	221.351		5000	186.756	209.951	203.177	206.667	172.138		5000	169.924	191.47	189.748	186.957	191.012
	6000	253.129	138.338	180.233	160.577	143.114		6000	286.989	83.5962	112.194	119.652	219.365		6000	150.369	188.542	191.117	195.186	172.627		6000	171.766	187.751	185.045	187.955	196.064
	7000	247.253	146.004	188.025	166.282	152.455		7000	283.237	79.4475	106.867	102.882	214.066		7000	87.9912	136.442	155.741	141.759	133.964		7000	166.376	182.801	179.934	188.453	194.89
	8000	239.124	148.221	191.296	168.378	158.134		8000	279.172	68.2582	88.5791	76.4577	183.397		8000	43.4368	63.1107	56.7216	59.4574	51.4937		8000	142.703	179.721	140.019	188.858	183.199
	9000	232.712	151.373	197.041	173.075	163.176		9000	273.617	41.4862	42.0925	15.2568	113.118		9000	26.9211	32.1335	28.4346	32.5039	21.4547		9000	96.2429	164.109	86.431	173.918	142.325
	10000	225.066	153.029	198.051	173.898	165.936		10000	250.077	15.2702	10.0102	4.44171	50.2336		10000	13.2612	16.0815	14.7863	17.6104	10.4684		10000	49.1301	125.333	35.0335	90.6748	75.0733
	11000	231.183	171.22	207.599	189.767	182.15		11000	232.886	6.19421	4.69462	1.8125	19.7736		11000	6.69092	9.38003	8.82491	9.86454	6.22031		11000	32.932	63.9159	11.1693	44.4715	29.6537
	12000	214.791	172.208	195.152	191.466	184.618		12000	192.413	3.45805	2.81918	1.64679	5.88227		12000	4.78373	6.03916	6.07955	5.61904	3.70078		12000	27.7373	25.9597	6.62784	26.8972	20.2825
	13000	204.972	170.979	172.307	189.104	171.217		13000	156.049	2.43478	1.68725	0.995016	2.66729		13000	3.77521	3.84486	5.33438	4.17773	3.40781		13000	25.2033	13.3807	4.25754	15.0524	11.2587
	14000	168.511	156.155	150.021	168.909	141.84		14000	90.7918	1.67844	2.44187	1.49213	2.03088		14000	2.3573	3.49891	4.148	3.45217	3.31016		14000	26.2072	8.34529	2.06738	8.52314	5.63404
	15000	116.598	118.278	114.942	136.879	102.38		15000	35.0426	1.62283	1.21007	1.19386	1.30669		15000	3.4457	3.84486	4.02054	2.82466	2.35312		15000	24.5308	6.00879	2.17168	5.40905	3.73726
	16000	71.0698	70.2245	67.2313	70.0057	67.2449		16000	11.9276	1.48936	1.54299	0.884545	0.801949		16000	3.87506	3.27157	2.86356	2.34422	2.00156		16000	20.418	5.77037	2.11479	3.09465	2.79826
	17000	41.8534	39.9874	45.716	40.125	43.8658		17000	3.34911	2.01212	5.83764	0.785121	0.231373		17000	3.236	2.3128	2.89298	2.11871	1.38633		17000	15.8665	5.2077	2.04842	3.01939	1.69962
	18000	18.1905	16.4281	23.6423	15.9497	22.53		18000	2.60997	0.666287	4.72791	1.11653	1.44933		18000	3.27595	2.6884	4.03034	1.79515	1.04453		18000	12.4554	1.04015	1.84932	2.9159	3.22081
	19000	10.4907	7.93395	12.2863	7.11292	10.9599		19000	2.60997	1.91202	1.53189	0.93978	1.29572		19000	2.00781	2.06569	3.32439	1.39315	0.585547		19000	9.94088	1.74586	2.55093	2.13503	2.45083
	20000	5.8762	4.72861	7.712	4.29999	5.67902		20000	2.03881	0.388223	1.35433	0.950827	1.61392		20000	2.03777	2.75759	2.942	1.42257	1.65977		20000	9.74596	1.78401	2.37078	1.7587	1.73718
	21000	12.2078	33.4966	34.5462	33.0661	26.1921		21000	1.99402	2.07885	1.43201	1.10549	1.22988		21000	1.74819	2.09535	2.88317	1.55003	0.0875		21000	7.28994	1.08783	1.49851	1.83397	2.2912
	22000	6.14449	10.0174	14.0948	14.8087	7.35085		22000	1.74763	1.46711	0.644105	1.85669	1.21891		22000	1.68828	2.28315	3.28517	1.76573	1.91367		22000	5.97421	1.89845	2.13375	1.53291	2.53534
	23000	4.21283	2.96566	8.29709	7.72327	3.79489		23000	1.98282	0.688532	0.200213	0.243814	0.977511		23000	2.27742	1.72963	2.77532	0.598958	1.16172		23000	7.03654	0.839874	1.94413	2.25733	2.6668
	24000	2.22751	3.20607	4.81316	4.00808	1.48617		24000	0.459737	0.176894	0.877148	0.40952	1.20794		24000	1.878	2.6884	2.62825	0.697007	0.282812		24000	8.6349	1.48837	1.91569	1.73048	3.17386
	25000	1.95922	2.77869	2.84515	2.89353	1.85769		25000	0.650122	0.310364	1.27665	1.05025	0.439853		25000	2.26743	2.47095	2.942	0.706812	0.937109		25000	7.68953	0.754044	2.22856	1.65521	1.38036
	26000	2.68359	1.65681	4.14829	2.81392	1.08811		26000	0.000573394	0.710777	1.45421	1.14967	0.626387		26000	1.76817	1.64067	2.44196	0.19696	0.810156		26000	5.40893	0.878021	2.45611	2.05976	2.15035
	27000	1.69093	2.565	1.35583	2.46894	3.05185		27000	0.79571	0.510571	0.921538	0.000777715	1.43836		27000	1.49856	1.20577	1.65757	1.05979	1.3375		27000	3.59615	1.35486	1.80191	2.02213	2.21608
	28000	1.31533	1.06917	2.92493	1.88512	1.67193		28000	0.784511	1.74518	0.000461648	0.398473	0.516661		28000	1.32881	1.58137	2.81454	0.52052	0.624609		28000	2.23169	1.02107	2.02946	1.9939	2.25364
	29000	0.134873	1.57668	2.49941	0.584808	2.38843		29000	1.57965	2.3458	0.610813	0.630462	0.000948034		29000	1.41868	2.22384	1.73601	0.628373	1.43516		29000	1.5787	1.56467	1.63125	1.92805	2.12218
	30000	1.61045	2.24446	2.44622	1.67283	0.796204		30000	1.18768	1.07782	0.821662	0.740933	1.98699		30000	0.819562	1.71975	1.97132	0.873494	0.614844		30000	1.25708	1.33578	1.34681	2.09739	1.55877
	31000	3.22017	3.49989	2.60579	1.99127	2.14959		31000	1.10929	-	0.366673	0.586273	1.10918		31000	1.62837	2.3128	1.97132	0.540129	1.27891		31000	1.68591	0.992462	1.68814	1.62699	0.948422
	32000	2.25434	1.6301	2.15368	0.982863	0.557371		32000	0.728516	1.36701	1.32104	1.38166	0.758058		32000	1.69827	0.602828	0.814351	1.46178	0.839453		32000	1.33505	1.02107	1.15719	1.76811	2.09401
	33000	1.42265	1.52326	1.59519	0.956326	1.32694		33000	0.594126	-	0.455451	0.884545	0.703195		33000	1.20899	1.41334	1.1183	0.942128	0.644141		33000	2.41687	0.725433	0.664169	1.62699	1.0611
	34000	0.886075	0.69521	1.78135	1.83205	1.53924		34000	1.00849	-	0.522035	1.09444	1.13113		34000	0.290341	2.00639	0.794741	0.422471	0.116797		34000	1.52023	0.76358	1.16667	1.36356	1.36158
	35000	2.03971	1.8705	1.32924	2.60162	1.83115		35000	0.605325	1.14456	1.74274	1.37062	1.53711		35000	0.829547	1.186	0.922204	0.334228	0.780859		35000	1.25708	1.41208	1.5554	1.56113	1.25829
	36000	1.34216	1.3897	1.32924	0.74403	1.2208		36000	1.80363	1.07782	1.76493	0.387426	1.40544		36000	0.250399	0.938892	2.3243	0.304813	-		36000	0.818504	1.08783	1.12875	1.27889	1.0611
	37000	1.15436	0.374675	1.0367	2.49547	0.955426		37000	0.79571	1.64507	1.30994	1.09444	1.22988		37000	0.0307228	-	1.87327	0.589153	0.224219		37000	0.27272	1.87938	1.08134	1.27889	1.04232
	38000	1.77142	1.12259	1.67497	0.000993546	1.83115		38000	1.73644	1.72293	1.19897	0.475802	1.03237		38000	0.000766871	1.11681	0.775132	0.687202	0.419531		38000	0.740535	2.24178	1.57436	1.70225	3.00481e-05
	39000	1.77142	0.000717998	3.11109	1.80551	0.769667		39000	2.30759	1.46711	1.58738	0.995016	2.44784		39000	0.42015	0.197574	0.853571	0.304813	0.702734		39000	0.925711	1.09737	0.446101	1.08132	0.816962
	40000	1.93239	3.01909	2.31325	1.35438	1.56578		40000	1.71404	1.88977	0.300089	0.575226	2.55757		40000	0.529988	0.37549	1.3144	0.000862826	0.751562		40000	0.672312	1.66003	0.730537	2.03154	1.53999
	41000	0.671446	0.374675	-	0.558271	9.34103e-05		41000	2.47558	1.93426	1.26555	0.33219	1.75657		41000	0.450105	1.50229	0.804546	0.893104	0.409766		41000	0.545612	1.99382	0.986529	2.11621	1.39914
	42000	0.510474	0.882189	1.43562	1.06247	1.85769		42000	1.36686	1.0667	0.866051	0.67465	2.87577		42000	0.689753	0.998197	1.04967	0.677397	0.458594		42000	1.24733	1.2881	0.967567	-	1.03293
	43000	0.000729739	1.36299	1.38243	1.40746	1.27387		43000	1.57965	1.60058	1.17678	0.796168	3.38051		43000	0.939385	1.26507	0.000549071	0.579349	0.302344		43000	0.52612	0.754044	0.683131	1.44823	1.03293
	44000	0.886075	1.20272	3.88234	1.11555	1.03504		44000	2.10601	1.67844	0.866051	0.763027	3.74261		44000	0.869488	1.38368	1.09869	0.363642	0.0191406		44000	0.14602	1.30717	1.00549	1.72107	0.826352
	45000	1.31533	2.32459	2.89834	2.38933	2.54765		45000	3.00194	0.833126	1.79822	0.475802	2.6234		45000	0.659797	0.731323	0.647669	0.922518	0.819922		45000	-	1.03061	0.853792	1.09072	1.67145
	46000	0.912904	1.09588	1.19627	1.69936	2.25574		46000	2.2292	2.36804	1.74274	1.05025	4.45583		46000	1.28887	1.47264	1.23596	1.27549	0.673437		46000	0.0583053	0.792191	0.796905	1.97509	0.694892
	47000	1.15436	1.46984	0.55799	1.0094	2.4415		47000	2.31879	1.87865	1.23226	0.685697	3.97303		47000	0.809576	1.38368	4.00093	1.04998	1.08359		47000	0.555358	0.000640869	0.588319	1.82456	1.07988
	48000	0.456817	1.17601	0.212257	1.59322	1.06157		48000	2.86755	1.26691	1.088	1.31538	3.45732		48000	0.919415	0.889471	1.25557	0.598958	0.175391		48000	0.662565	0.687286	0.000485437	1.00605	1.52121
	April 2th sampling / 400 mg (slow-release urea) kg-1 (sediment)							April 16th sampling / 400 mg (slow-release urea) kg-1 (sediment)							April 30th sampling / 400 mg (slow-release urea) kg-1 (sediment)							May 14th sampling 400 mg (slow-release urea) kg-1 (sediment)
	Rhizosphere distance / mm Depth / μm	N1	N2	N3	N4	N5		Rhizosphere distance / mm Depth / μm	N1	N2	N3	N4	N5		Rhizosphere distance / mm Depth / μm	N1	N2	N3	N4	N5		Rhizosphere distance / mm Depth / μm	N1	N2	N3	N4	N5
	0	323.788	323.078	280.129	219.533	161.9		0	296.864	291.401	264.25	173.109	125.376		0	96.9094	81.5531	134.869	109.002	35.3178		0	261.113	225.973	240.973	166.225	176.201
	1000	320.237	322.989	285.256	214.561	184.343		1000	285.145	293.195	231.385	182.999	143.192		1000	39.2958	35.751	42.0518	33.0609	11.3982		1000	256.976	233.39	242.841	183.561	196.217
	2000	307.084	317.802	286.18	204.52	198.791		2000	259.198	246.059	191.745	179.543	158.068		2000	17.4175	8.71258	21.7067	8.75338	4.82893		2000	232.254	234.892	243.555	193.706	199.962
	3000	289.229	304.571	272.698	187.919	192.583		3000	212.687	226.017	176.11	138.838	162.371		3000	6.2761	5.57937	9.74737	6.32973	2.26832		3000	165.984	206.006	243.258	198.968	202.762
	4000	262.941	280.593	237.519	167.934	156.354		4000	126.386	149.22	136.198	72.3368	131.882		4000	4.95423	4.68671	4.96186	3.29351	2.33896		4000	128.476	149.608	188.858	185.498	187.379
	5000	232.396	239.159	193.572	140.214	96.5487		5000	68.371	61.1024	89.2847	39.5166	72.8342		5000	4.68446	3.35666	3.14849	2.18378	1.89748		5000	92.0289	114.129	132.245	147.799	146.154
	6000	204.261	148.087	138.033	112.651	52.1849		6000	41.5951	34.8601	61.54	20.7897	43.9461		6000	4.6485	4.01722	2.7239	1.97071	1.67673		6000	43.719	66.6	96.7499	101.183	104.049
	7000	181.989	110.718	88.8183	96.7523	24.4575		7000	21.496	18.3153	36.0949	10.0271	28.0372		7000	3.57841	3.7405	2.75928	1.65111	1.7562		7000	23.1917	32.1055	50.6158	32.6538	47.0772
	8000	172.503	83.5548	61.6954	85.5362	13.9943		8000	10.4473	10.7186	24.4827	6.17525	18.5441		8000	2.85903	3.05316	2.80351	1.36702	1.98577		8000	10.4219	10.371	25.5122	3.7927	20.0805
	9000	170.049	66.5966	34.1505	75.9425	6.88805		9000	5.59851	6.0742	15.9519	4.35127	15.217		9000	3.62337	0.669775	2.89197	1.29599	1.52663		9000	5.70916	4.06769	12.2187	0.709672	6.23104
	10000	146.162	46.3643	20.29	65.9103	4.6995		10000	3.79301	3.92803	12.4173	2.26673	10.8111		10000	3.4795	2.51757	3.52001	1.34926	1.98577		10000	4.15444	3.18798	5.74841	1.62974	3.76946
	11000	115.841	58.856	25.7076	59	6.98396		11000	2.33952	2.66759	6.17497	1.15649	7.10928		11000	4.23485	3.437	2.37007	1.10068	1.44716		11000	3.32849	2.85708	4.02459	2.09784	3.43856
	12000	103.571	20.491	9.85952	33.7791	4.86517		12000	2.24867	2.39506	3.75056	1.17914	4.10011		12000	2.92198	2.1248	3.16619	1.64223	1.56195		12000	3.74146	3.15569	2.78184	1.089	1.59035
	13000	79.5229	11.3892	6.72861	29.9469	4.41176		13000	3.17981	2.83792	3.38803	1.9042	2.13563		13000	2.30151	1.19644	2.40546	1.44692	1.47365		13000	3.25561	2.26791	3.04643	1.63781	1.78405
	14000	61.3462	8.00819	4.72342	7.99703	3.72294		14000	2.66882	2.56539	1.98323	1.08851	1.67006		14000	2.79608	0.482318	2.86543	1.49131	1.00568		14000	2.13815	2.35669	2.98228	0.854946	1.96161
	15000	40.4122	4.71621	3.9319	4.57696	4.01939		15000	2.26003	2.70165	2.77627	1.49636	1.79497		15000	2.99391	0.866159	2.7239	1.4558	1.34121		15000	2.38917	2.42933	3.11057	1.12128	0.855914
	16000	27.7947	3.96884	3.45699	3.65617	3.07771		16000	1.8853	2.61081	3.46734	1.07718	1.4316		16000	2.85004	2.21407	2.08701	1.68662	0.758448		16000	2.04098	2.67145	2.73373	2.00907	0.742924
	17000	19.8084	3.23927	2.66546	2.99846	3.41776		17000	3.13439	2.5881	2.78759	1.42838	2.15834		17000	2.4274	2.5622	2.88312	1.63335	1.41184		17000	2.04098	1.1945	2.88607	1.40376	0.976976
	18000	15.9178	2.91897	3.7736	3.32293	2.80741		18000	1.13585	1.65696	2.36842	1.31509	1.99936		18000	2.01375	2.43723	3.27233	1.64223	1.15578		18000	1.78996	2.71987	2.21258	0.959866	0.960834
	19000	10.5549	3.16809	3.21073	1.83213	3.38289		19000	2.98677	2.30422	0.000652552	0.567376	0.875182		19000	1.97779	1.49102	2.66198	1.47355	0.917382		19000	1.55513	1.63839	2.22862	1.39569	1.44508
	20000	5.70961	3.51508	3.9319	3.37555	3.32185		20000	2.10105	2.4859	3.53531	1.37174	1.62464		20000	1.26739	2.21407	2.79467	1.57121	0.749619		20000	0.842545	1.73524	2.69364	2.00907	0.525013
	21000	12.2771	6.27323	3.52734	2.25306	2.57199		21000	1.32889	2.25879	2.13051	1.37174	0.772983		21000	1.51918	2.55327	3.31656	2.18378	1.31472		21000	1.11786	1.02501	2.53329	1.20199	1.12225
	22000	6.03977	3.40831	2.64787	3.016	3.47008		22000	1.53328	3.08774	1.83596	1.54167	1.4316		22000	1.77996	1.23215	2.53814	2.45899	1.29706		22000	1.27981	1.41241	2.0843	1.04057	0.944693
	23000	5.07606	2.26057	3.36024	1.70936	3.37417		23000	0.965516	1.90678	2.30045	0.624021	1.38617		23000	1.92383	1.52672	3.06004	2.0151	1.48248		23000	1.47415	1.35591	2.26069	0.766167	0.91241
	24000	4.30866	1.77122	3.36904	2.43722	3.41776		24000	2.38494	2.56539	2.9462	2.14211	0.852471		24000	2.09469	1.35712	2.53814	2.43236	1.30589		24000	1.22313	1.65453	2.14844	1.82344	0.742924
	25000	4.57635	2.58977	3.2635	2.66522	2.3976		25000	2.5212	2.32693	2.26646	1.13383	0.227925		25000	2.47236	2.24977	3.0335	1.37589	1.92397		25000	1.05308	1.84823	2.74977	1.32305	0.59765
	26000	3.66618	2.25167	2.46319	2.48984	2.8946		26000	2.74831	2.13388	2.53836	1.2811	1.20449		26000	1.60011	1.62491	2.69736	1.70437	1.50014		26000	1.56323	1.83209	2.14844	1.72659	0.613791
	27000	4.13019	0.925981	2.59511	1.74444	3.05155		27000	1.74904	2.80385	2.20981	1.4737	1.60193		27000	1.61809	1.62491	2.14893	1.89081	1.24408		27000	1.20693	1.7191	2.63752	1.40376	0.161829
	28000	3.7108	1.5132	3.08761	1.74444	3.3916		28000	1.32889	2.31557	1.94925	1.1225	1.26126		28000	1.43825	2.00876	3.46694	1.84642	1.27057		28000	2.21913	1.41241	2.14844	1.38762	0.412022
	29000	3.26463	2.02034	1.40782	1.59536	2.4848		29000	1.3516	1.58883	1.36014	0.850602	1.71548		29000	1.89685	1.52672	2.14893	1.67774	0.99685		29000	1.48225	1.21064	2.16447	1.25848	0.92048
	30000	2.35446	1.45982	2.32247	2.10398	2.46736		30000	1.52193	1.57747	2.02855	1.9042	0.784339		30000	1.47422	1.54458	1.97202	2.1749	1.9946		30000	1.58752	1.26714	2.0843	1.19392	0.484659
	31000	2.53293	1.26408	1.90912	1.22704	2.42376		31000	0.000308866	2.08846	1.71134	0.963892	2.10156		31000	1.92383	0.937571	2.15778	1.64223	0.970361		31000	1.19884	1.94508	1.94799	0.69353	0.000413223
	32000	2.91663	1.09503	0.545943	1.0078	3.13003		32000	0.568078	2.36099	2.34576	0.895918	1.00009		32000	1.2584	2.27655	1.59166	1.49131	1.45599		32000	0.907325	1.25099	1.89187	0.524044	1.63878
	33000	3.09509	1.45092	1.55733	-	1.81341		33000	0.840607	2.07711	2.39108	1.41705	1.10229		33000	1.56414	1.35712	2.43199	1.57121	1.88865		33000	1.20693	1.8563	2.01214	1.66202	0.799419
	34000	3.15755	1.39753	1.64528	0.253634	1.97908		34000	0.48859	1.38443	2.31177	1.41705	0.65943		34000	1.39329	0.901865	2.56468	1.50906	0.970361		34000	1.12596	1.88051	2.75779	1.34726	1.07382
	35000	3.01478	1.72673	1.02086	1.20073	1.85701		35000	0.0116642	2.0544	1.03159	0.737311	1.52244		35000	1.10553	1.37497	2.37892	2.08612	0.493558		35000	1.42557	1.62225	2.06024	0.604752	1.13032
	36000	2.37231	2.40292	1.63649	0.91134	1.86573		36000	0.511301	3.67822	1.91526	1.4737	0.0916606		36000	0.700881	0.625143	4.2542	1.31375	0.917382		36000	0.526741	1.50926	1.89187	1.06479	0.581508
	37000	2.18492	2.11821	2.25211	1.10427	1.56055		37000	1.38566	2.71301	1.37147	1.33775	0.000817587		37000	1.66306	1.16073	2.51161	1.1717	1.38536		37000	0.89113	0.661829	2.17249	1.06479	0.629933
	38000	2.27415	0.8637	1.48698	0.946418	2.24066		38000	0.19335	2.27015	1.22419	1.83623	0.273347		38000	0.961657	0.866159	1.82164	0.727812	0.352283		38000	0.162352	0.99273	2.32483	0.588611	0.944693
	39000	2.36338	0.872597	1.58372	0.490408	2.15346		39000	0.352326	2.23608	0.906975	0.556047	0.704851		39000	1.78895	1.57136	-	0.550256	0.458239		39000	0.308108	0.702182	0.953792	1.64588	0.28289
	40000	1.74768	0.445529	2.74462	1.36735	0.854286		40000	0.204706	1.94084	1.58672	0.861931	1.2272		40000	1.60011	1.19644	1.12283	0.390455	0.246327		40000	0.591522	0.314786	2.5814	0.661247	0.888197
	41000	2.36338	0.614577	1.17916	1.03411	1.78725		41000	1.10178	2.1566	1.37147	0.000924449	1.11364		41000	1.27639	0.625143	1.75972	0.568011	0.502388		41000	0.623912	0.0726627	-	0.168931	0.460447
	42000	1.76553	1.73563	1.2759	0.946418	1.32513		42000	0.795185	2.33828	1.38279	1.34908	1.7609		42000	-	1.53565	2.37007	1.50906	0.617173		42000	0.421473	0.669899	1.7716	0.653177	0.589579
	43000	2.71139	0.685755	0.194156	1.73567	1.58671		43000	1.63548	1.13461	2.03988	1.53034	1.09093		43000	0.691888	0.973278	2.18432	0.319432	-		43000	0.154255	0.968518	2.30879	0.782309	0.363598
	44000	2.28307	0.952672	0.132593	2.2706	1.31641		44000	-	1.12326	1.53007	0.329466	1.13636		44000	-	0.393053	2.17547	-	0.414091		44000	0.575326	0.201795	1.53909	0.532115	0.734853
	45000	1.7566	0.96157	0.91532	2.27937	1.10715		45000	1.3516	0.419222	0.657736	0.75997	0.716206		45000	0.0174666	0.535878	1.75088	0.5325	0.546536		45000	0.640107	0.831315	2.33285	0.459478	0.581508
	46000	1.40859	0.659063	0.000672618	1.35858	1.63902		46000	0.147929	-	0.38584	-	0.738917		46000	0.521035	0.000285649	1.33513	0.461477	0.484728		46000	0.0327918	1.25099	2.28474	0.524044	0.468518
	47000	1.4889	0.890392	0.0446461	0.358867	-		47000	1.23805	2.07711	0.533117	0.318137	0.704851		47000	1.40228	0.500171	2.03394	0.28392	1.22642		47000	0.000401638	2.58264e-05	1.15424	-	0.654145
	48000	-	0.000666226	0.660274	1.66551	0.714777		48000	1.1472	1.07783	0.227233	0.691995	0.886537		48000	0.116382	0.160963	1.67127	0.541378	0.263986		48000	0.113767	0.403564	2.19654	0.822663	0.331315
	April 2th sampling / 600 mg (slow-release urea) kg-1 (sediment)							April 16th sampling / 600 mg (slow-release urea) kg-1 (sediment)							April 30th sampling / 600 mg (slow-release urea) kg-1 (sediment)							May 14th sampling 600 mg (slow-release urea) kg-1 (sediment)
	Rhizosphere distance / mm Depth / μm	N1	N2	N3	N4	N5		Rhizosphere distance / mm Depth / μm	N1	N2	N3	N4	N5		Rhizosphere distance / mm Depth / μm	N1	N2	N3	N4	N5		Rhizosphere distance / mm Depth / μm	N1	N2	N3	N4	N5
	0	322.456	195.683	181.252	218.36	115.458		0	158.945	77.5181	49.411	31.5478	208.584		0	220.447	67.1115	93.6225	158.885	114.689		0	218.95	211.092	184.799	162.255	166.653
	1000	318.376	200.593	181.126	208.165	138.446		1000	168.011	154.135	70.0311	23.7398	208.797		1000	212.428	55.9659	51.7824	108.836	84.2656		1000	166.145	216.074	184.905	160.62	162.838
	2000	294.763	186.082	158.749	186.937	104.026		2000	171.394	183.905	76.0139	20.6346	206.814		2000	201.602	62.1048	24.3785	64.8817	54.133		2000	93.2686	215.709	185.548	162.36	160.789
	3000	259.187	148.604	110.86	154.751	63.2777		3000	172.274	191.51	100.361	18.1032	202.29		3000	188.914	64.7497	9.93354	38.3863	42.7309		3000	44.8213	215.413	185.313	163.628	159.899
	4000	223.915	98.817	70.2149	89.6497	24.4303		4000	178.003	188.799	112.461	15.0093	176.946		4000	180.503	55.4794	4.81189	21.516	31.892		4000	24.833	217.464	185.857	164.491	158.528
	5000	185.245	72.1246	33.074	46.531	11.5062		5000	179.717	173.667	97.1391	11.7803	131.926		5000	168.233	45.8376	2.49432	9.93251	18.2817		5000	10.8702	217.547	184.618	164.903	160.382
	6000	145.733	38.2442	15.9959	18.1933	5.76956		6000	173.323	152.819	86.5316	10.8015	89.918		6000	153.638	24.2099	1.33554	4.99701	9.36944		6000	6.10924	163.343	137.634	160.958	134.325
	7000	100.327	23.2461	7.5449	11.3604	3.81843		7000	160.05	133.648	73.971	8.96765	75.5383		7000	143.196	13.5332	1.40631	2.42387	3.64203		7000	4.12869	107.612	78.496	121.168	108.916
	8000	80.4824	17.378	4.19971	6.12039	3.64333		8000	134.644	113.824	65.2942	8.74264	60.2515		8000	139.899	7.57123	1.5213	2.41509	2.28716		8000	3.72497	69.7794	39.237	65.8743	74.9099
	9000	62.2393	15.1753	3.61283	3.48783	2.37594		9000	96.0435	88.9713	21.8427	5.13116	49.2876		9000	133.519	3.46684	1.5213	1.82669	1.64492		9000	3.24506	35.5465	23.1902	33.7272	42.2146
	10000	39.798	12.6112	3.1601	2.12963	1.75891		10000	63.7357	70.9251	27.7807	1.68844	33.3289		10000	127.015	2.9361	0.857875	2.1165	2.08481		10000	3.27553	20.5488	10.3029	16.6111	28.817
	11000	89.5028	25.4067	9.61574	9.08831	4.3354		11000	30.9656	53.9815	32.1359	1.31716	18.7588		11000	120.715	2.29036	1.54784	1.36124	1.3018		11000	3.26792	8.90748	3.38686	7.67057	15.9695
	12000	30.9883	11.2913	4.93749	3.8148	2.33425		12000	26.4324	41.617	2.42374	1.86845	8.9148		12000	110.7	2.29921	0.66327	2.13406	1.293		12000	3.05463	4.18413	1.8676	2.89276	5.94766
	13000	11.194	5.58287	3.0008	2.02064	2.40095		13000	15.8661	33.314	2.36762	0.96839	4.62554		13000	98.689	2.6265	1.08786	1.39637	0.976281		13000	2.32335	3.8576	1.79957	1.9852	2.43626
	14000	5.73123	4.05279	3.05111	2.31407	1.65052		14000	9.35947	26.3385	1.22268	0.540863	3.93119		14000	81.6526	1.73309	1.15863	0.720155	1.08186		14000	2.07959	2.3844	2.23797	1.8802	2.31569
	15000	5.46147	4.01075	2.64029	2.8758	2.13413		15000	4.78112	19.8356	1.57065	0.563364	3.16965		15000	65.8459	1.92769	0.99056	1.72131	1.15224		15000	2.46808	4.12338	1.7769	1.9102	1.53203
	16000	4.42454	2.71607	2.58999	2.35599	3.00963		16000	3.37154	17.2704	1.67168	2.08221	3.22565		16000	53.3893	1.41464	1.34439	1.49297	0.923494		16000	2.79563	3.91835	1.52746	1.22765	1.21556
	17000	4.71117	3.02713	1.63422	1.9368	2.37594		17000	4.12707	11.015	1.92985	1.64343	2.65449		17000	44.0781	2.28152	1.33554	1.26464	1.33699		17000	2.26241	3.13619	1.6484	1.67519	1.75809
	18000	4.77018	2.91783	1.13957	1.66013	2.20917		18000	2.76259	6.91979	1.00941	0.945889	-		18000	34.7491	2.23729	0.972869	1.26464	0.738739		18000	2.65852	2.78688	1.02104	1.17515	1.29844
	19000	3.58995	2.50589	1.40785	1.96195	2.64276		19000	2.97685	5.02967	0.66144	0.529612	1.72497		19000	11.8498	2.04269	0.893257	1.42272	1.21382		19000	2.05674	3.47791	0.786728	1.65018	1.38133
	20000	3.5225	1.49704	2.7409	2.90934	2.6094		20000	3.85643	2.49825	1.51453	1.35091	1.72497		20000	7.59961	2.05153	1.2117	1.73887	1.25781		20000	2.96322	2.878	0.990809	1.61268	0.778513
	21000	2.96611	2.17801	2.34685	1.09002	2.35926		21000	2.94302	3.67958	1.84005	0.867133	2.03854		21000	8.00057	2.13114	1.34439	1.79156	1.16983		21000	1.91962	2.72613	2.03389	1.36266	1.56971
	22000	2.09779	2.94306	1.34078	2.02064	1.95069		22000	3.4392	2.13823	1.75025	0.113335	0.31388		22000	7.77781	2.35228	1.55668	2.0199	1.49535		22000	2.40714	1.83765	1.61061	1.51267	0.45199
	23000	2.99983	2.11076	2.86666	2.27216	2.09244		23000	2.43557	2.49825	1.66045	0.439606	2.20653		23000	9.99646	2.05153	0.981714	1.53688	0.905898		23000	3.44312	1.64781	1.50479	1.26266	0.577572
	24000	2.51087	2.29571	1.23179	1.7775	3.2431		24000	3.61962	3.02704	1.00941	1.1259	0.773043		24000	8.94506	1.49425	1.20286	1.774	1.46896		24000	3.84685	2.05787	1.08907	1.58768	1.41901
	25000	1.99663	1.69041	1.02219	2.12963	3.38485		25000	3.19111	2.47575	1.85128	1.31716	2.6097		25000	4.40083	1.96307	0.459819	1.39637	1.12584		25000	3.32124	2.55906	1.01348	0.662621	1.6325
	26000	2.52773	2.65722	1.16472	1.23255	1.76725		26000	2.15365	2.09323	1.638	1.51968	1.09782		26000	3.22468	1.55617	1.54784	2.09015	1.25781		26000	2.40714	1.17699	1.14954	0.925138	1.36877
	27000	2.64576	3.09438	1.27371	1.89488	1.79227		27000	2.30025	2.53201	2.45742	1.24966	1.45619		27000	2.52077	1.78616	1.25593	1.73887	0.870707		27000	2.52902	1.86043	0.953016	1.38766	1.73297
	28000	2.3507	1.01784	1.39108	0.402534	2.41763		28000	1.74769	1.94697	1.04309	0.934638	1.56818		28000	2.81481	1.80385	1.34439	1.3349	0.202069		28000	1.53113	1.50352	0.884989	1.60018	0.577572
	29000	1.90389	2.35456	1.56715	1.3583	1.37536		29000	2.37919	1.32818	1.27881	2.07096	0.81784		29000	2.01289	1.45887	0.344826	1.22951	0.853111		29000	2.16338	1.93637	0.884989	0.637614	1.43157
	30000	2.19052	2.16961	2.05342	0.335463	2.0841		30000	2.3228	1.14817	1.73903	1.37342	1.22101		30000	2.10199	1.20235	0.229832	1.65105	1.04666		30000	1.6911	2.07306	0.756494	1.17515	0.615248
	31000	3.0757	1.52226	1.15633	0.922339	1.94235		31000	1.69131	2.23949	1.23391	0.934638	2.15053		31000	2.32475	1.4058	0.565968	1.28221	0.993877		31000	1.3026	1.4124	0.862314	7.35633e-05	1.07992
	32000	2.48558	0.0678455	1.39947	1.36669	1.40871		32000	2.00705	2.52076	1.25636	1.30591	0.549061		32000	1.42481	1.93654	0.194449	1.25586	1.24022		32000	1.97294	1.07068	0.665792	0.362602	0.426868
	33000	2.0725	1.38775	1.57553	1.13194	2.34258		33000	2.63855	1.7107	1.17778	0.214592	1.45619		33000	1.25552	1.62694	0.27406	1.30855	1.50415		33000	1.44734	0.994739	0.975692	0.912634	1.07992
	34000	0.850108	1.87536	1.34078	1.14032	1.29198		34000	1.84918	1.28318	0.740014	1.1484	0.627455		34000	1.05949	1.25542	0.751727	0.895796	1.62732		34000	1.40925	1.2833	1.10419	1.38766	1.16783
	35000	2.26639	0.841294	1.40785	2.00387	2.44264		35000	2.41302	1.11442	0.167547	1.1709	1.04182		35000	1.70994	1.52964	0.380208	1.51932	0.77393		35000	1.31784	1.64781	1.21756	0.83763	1.15527
	36000	2.63733	1.04306	2.17079	1.97033	1.00848		36000	1.60109	1.92447	0.964511	1.04715	1.41139		36000	1.81686	1.12274	0.238678	0.544514	0.765132		36000	1.3026	0.653018	0.310541	0.887635	0.816189
	37000	1.55825	0.992621	1.18149	1.05648	0.25805		37000	0.992151	1.21567	0.695115	1.39592	0.302681		37000	0.908018	0.689297	0.327134	1.56323	0.712345		37000	0.929346	0.690987	0.272748	1.01264	0.627809
	38000	2.00506	1.18598	-	1.64336	-		38000	1.82663	0.304363	0.66144	0.000828053	0.000304616		38000	0.515967	0.609686	1.07902	0.843104	0.422016		38000	2.11768	0.015139	0.884989	1.36266	0.665485
	39000	2.42657	1.3205	0.175411	1.20739	0.249712		39000	1.7928	0.000594038	-	0.945889	0.17949		39000	1.04167	0.99005	0.804801	1.16804	1.293		39000	1.53113	0.615049	0.892548	1.63768	1.40644
	40000	2.58674	0.807666	1.56715	1.02295	0.433151		40000	0.913214	1.90197	0.863488	1.01339	0.403473		40000	0.533788	0.7866	0.680961	0.562078	0.905898		40000	0.853171	0.622643	0.401243	1.28766	1.31854
	41000	1.70157	1.45501	0.820975	1.23255	0.208021		41000	0.698957	1.23817	0.66144	1.59843	0.213088		41000	0.551608	0.220477	0.831338	1.2383	1.06426		41000	0.0761871	0.599861	0.461711	2.03771	0.238488
	42000	2.30011	0.177137	0.368242	0.561829	0.558223		42000	0.958321	0.72064	0.897162	1.55343	0.0563002		42000	0.649621	1.00774	-	1.21195	-		42000	0.639882	1.32887	0.862314	1.21265	0.590133
	43000	2.27482	2.08554	1.03057	0.930723	0.324755		43000	-	1.02441	1.23391	1.71094	0.280282		43000	0.480326	1.13158	1.27362	1.85304	1.40738		43000	1.45495	0.379641	0.000640964	1.51267	1.46924
	44000	0.993423	0.193951	1.36593	0.729508	2.26754		44000	0.766617	1.40693	1.98597	0.765877	0.31388		44000	0.943659	0.768909	0.964023	0.851886	0.492399		44000	1.0817	0.850457	0.0686678	2.06271	0.175697
	45000	1.73529	1.95943	0.00773201	1.15709	0.791691		45000	1.66875	1.50819	0.156322	0.619618	0.661052		45000	0.382314	-	0.804801	0.544514	0.615569		45000	0.662734	0.911207	0.121577	1.77519	-
	46000	-	1.69041	0.494001	0.000104632	0.908425		46000	2.05216	0.585631	1.04309	0.990891	0.101097		46000	-	0.503538	0.406745	1.01874	0.668356		46000	0.959816	0.7973	0.136695	2.31273	0.703161
	47000	1.08616	1.15235	0.250867	0.184552	2.1925		47000	1.62365	0.709389	1.03186	0.135837	0.493066		47000	0.168468	1.04312	0.565968	2.81025e-05	0.729941		47000	1.2188e-05	0.713768	0.325658	1.9502	0.351516
	48000	1.1536	0.000589166	0.200563	0.872035	0.649942		48000	1.66875	0.866899	0.481843	0.270845	0.302681		48000	0.0348141	1.01659	0.105992	0.404002	0.905898		48000	0.952199	-	0.0762263	2.07521	0.150582
	- indicating that nitrate nitrogen is lower than the detection limit of 0 μmol / L
In situ measurement of pH value
	April 2th sampling / 0 mg (slow-release urea) kg-1 (sediment)							April 16th sampling / 0 mg (slow-release urea) kg-1 (sediment)							April 30th sampling / 0 mg (slow-release urea) kg-1 (sediment)							May 14th sampling 0 mg (slow-release urea) kg-1 (sediment)
	Rhizosphere distance / mm Depth / μm	N1	N2	N3	N4	N5		Rhizosphere distance / mm Depth / μm	N1	N2	N3	N4	N5		Rhizosphere distance / mm Depth / μm	N1	N2	N3	N4	N5		Rhizosphere distance / mm Depth / μm	N1	N2	N3	N4	N5
	0	7.58746	7.432	7.30949	7.27014	7.25481		0	8.06632	7.57531	7.3915	7.2536	7.23167		0	7.80297	7.78874	7.6853	7.73702	7.72602		0	7.54951	7.53514	7.41794	7.41665	7.48253
	1000	7.59762	7.42813	7.31838	7.28025	7.26392		1000	8.07089	7.6123	7.41445	7.25682	7.23174		1000	7.8028	7.79699	7.74711	7.78668	7.75482		1000	7.55077	7.55356	7.46604	7.47678	7.50218
	2000	7.60116	7.42944	7.32422	7.29466	7.27162		2000	8.07414	7.62465	7.42859	7.26146	7.23804		2000	7.80444	7.80204	7.78304	7.80411	7.77446		2000	7.5504	7.55621	7.48436	7.50727	7.51094
	3000	7.60186	7.43229	7.33386	7.30585	7.27917		3000	8.08223	7.63538	7.44112	7.26624	7.24175		3000	7.80836	7.80527	7.8105	7.82832	7.79233		3000	7.55259	7.56078	7.50842	7.51701	7.52383
	4000	7.6019	7.43504	7.34469	7.31517	7.28919		4000	8.08354	7.63699	7.45074	7.27364	7.24535		4000	7.80953	7.81028	7.83508	7.85843	7.80744		4000	7.55254	7.56072	7.52109	7.52789	7.5231
	5000	7.60051	7.43855	7.35828	7.32452	7.29987		5000	8.08836	7.63118	7.46001	7.2813	7.25128		5000	7.8067	7.81505	7.85444	7.87816	7.82465		5000	7.55421	7.5633	7.5264	7.52693	7.52917
	6000	7.60001	7.44157	7.36815	7.33525	7.32166		6000	8.08721	7.63385	7.46672	7.28514	7.25651		6000	7.80626	7.81884	7.86835	7.89971	7.83676		6000	7.55451	7.56686	7.53378	7.54173	7.53333
	7000	7.5989	7.44424	7.37737	7.34718	7.33054		7000	8.0809	7.64766	7.47225	7.29065	7.26221		7000	7.80399	7.82353	7.87955	7.9212	7.8536		7000	7.55535	7.56593	7.53651	7.54355	7.53638
	8000	7.59751	7.44691	7.38361	7.35953	7.34161		8000	8.06678	7.6593	7.47853	7.29568	7.26659		8000	7.80084	7.8264	7.8889	7.94474	7.86876		8000	7.55368	7.56805	7.53826	7.54474	7.54042
	9000	7.59539	7.45026	7.38987	7.36579	7.35102		9000	8.0588	7.67434	7.48433	7.30182	7.27123		9000	7.7995	7.83271	7.90003	7.95971	7.88113		9000	7.55742	7.56866	7.53913	7.54665	7.54366
	10000	7.59487	7.45198	7.39602	7.37379	7.35742		10000	8.05222	7.69629	7.49029	7.30527	7.27216		10000	7.79804	7.84238	7.90974	7.96453	7.88825		10000	7.55696	7.56928	7.54196	7.54813	7.54445
	11000	7.59199	7.46411	7.41578	7.3964	7.371		11000	8.01185	7.71058	7.4985	7.3093	7.27289		11000	7.7958	7.85107	7.91777	7.96504	7.89436		11000	7.55761	7.57381	7.54541	7.54668	7.545
	12000	7.58936	7.46384	7.41672	7.39547	7.36963		12000	8.03953	7.71677	7.50335	7.31049	7.27426		12000	7.7925	7.8621	7.92746	7.96258	7.89786		12000	7.55516	7.57555	7.54895	7.54897	7.54728
	13000	7.58804	7.46378	7.4182	7.39524	7.37022		13000	8.02907	7.72122	7.51024	7.31586	7.2741		13000	7.78855	7.86852	7.93668	7.96432	7.90666		13000	7.55792	7.57449	7.55056	7.54906	7.54669
	14000	7.58781	7.4636	7.41773	7.3921	7.37		14000	8.01933	7.73354	7.51638	7.31885	7.27476		14000	7.78627	7.87678	7.94624	7.9603	7.91266		14000	7.55682	7.57375	7.55048	7.55017	7.54838
	15000	7.58769	7.4609	7.41511	7.38547	7.36536		15000	8.00616	7.74117	7.51983	7.32083	7.27334		15000	7.78616	7.87727	7.9582	7.95325	7.91731		15000	7.55818	7.57089	7.55751	7.54909	7.55034
	16000	7.5863	7.46373	7.41339	7.38113	7.36573		16000	7.98173	7.74066	7.51991	7.32076	7.27371		16000	7.78258	7.86447	7.95803	7.95595	7.92092		16000	7.55953	7.56547	7.56034	7.55266	7.55352
	17000	7.58533	7.47293	7.41913	7.38456	7.36692		17000	7.93969	7.71758	7.53814	7.33237	7.3214		17000	7.77732	7.84312	7.90401	7.92765	7.90887		17000	7.55794	7.56042	7.56554	7.55337	7.55765
	18000	7.58398	7.47676	7.42555	7.38787	7.37251		18000	7.89234	7.70307	7.5627	7.35261	7.37912		18000	7.7853	7.83549	7.85398	7.87729	7.88679		18000	7.559	7.55528	7.56383	7.55159	7.55999
	19000	7.58307	7.47971	7.42713	7.39351	7.37626		19000	7.87196	7.70079	7.59214	7.37326	7.39145		19000	7.84255	7.87342	7.85349	7.88204	7.89576		19000	7.55949	7.55742	7.55908	7.55039	7.56236
	20000	7.5825	7.48159	7.42528	7.39674	7.37781		20000	7.85474	7.69449	7.59976	7.38476	7.38076		20000	7.86164	7.89964	7.86086	7.89397	7.89936		20000	7.56274	7.55405	7.54625	7.54442	7.56287
	21000	7.58058	7.4852	7.4305	7.40202	7.38355		21000	7.83532	7.67837	7.59098	7.38992	7.36258		21000	7.86098	7.9095	7.85819	7.89528	7.90078		21000	7.58157	7.54909	7.55235	7.53619	7.58103
	22000	7.57743	7.47713	7.42504	7.39842	7.37875		22000	7.81811	7.65084	7.55665	7.38318	7.35527		22000	7.84314	7.90957	7.85462	7.88998	7.89897		22000	7.60949	7.54646	7.58084	7.53264	7.5967
	23000	7.57233	7.46505	7.41936	7.39076	7.37096		23000	7.80017	7.6104	7.53654	7.3688	7.34985		23000	7.81397	7.90183	7.85129	7.88498	7.89607		23000	7.62759	7.54819	7.60456	7.52648	7.60702
	24000	7.57021	7.45643	7.41293	7.38306	7.35904		24000	7.7775	7.58091	7.51811	7.34977	7.34427		24000	7.80808	7.88274	7.84978	7.86961	7.88465		24000	7.64048	7.55015	7.62304	7.52774	7.61873
	25000	7.56581	7.44647	7.40678	7.37459	7.3417		25000	7.76307	7.55716	7.5005	7.32812	7.33973		25000	7.79739	7.86396	7.83743	7.85499	7.86236		25000	7.64812	7.5526	7.63179	7.52747	7.62176
	26000	7.5663	7.43497	7.39909	7.36509	7.32771		26000	7.75226	7.54616	7.482	7.30485	7.32902		26000	7.79558	7.83893	7.81702	7.82733	7.81933		26000	7.6551	7.55508	7.63869	7.53103	7.61713
	27000	7.56857	7.42446	7.39033	7.35381	7.3184		27000	7.7242	7.53516	7.46752	7.28544	7.30275		27000	7.79266	7.81192	7.79612	7.80101	7.78867		27000	7.65965	7.55778	7.63582	7.54066	7.61551
	28000	7.57146	7.41384	7.37745	7.34111	7.31025		28000	7.67533	7.51821	7.44921	7.26761	7.27185		28000	7.76315	7.78417	7.7591	7.78429	7.75138		28000	7.6621	7.56078	7.63754	7.5435	7.62193
	29000	7.57106	7.40211	7.35669	7.32372	7.30124		29000	7.62329	7.49103	7.4215	7.25146	7.2531		29000	7.70532	7.74273	7.7155	7.7662	7.72234		29000	7.66279	7.56247	7.63452	7.54551	7.62048
	30000	7.56237	7.38568	7.33572	7.3119	7.2939		30000	7.5738	7.45387	7.4048	7.24197	7.23615		30000	7.6603	7.7144	7.67846	7.75174	7.70138		30000	7.66254	7.56606	7.63413	7.54709	7.61928
	31000	7.54967	7.36893	7.35435	7.29456	7.27841		31000	7.54969	7.41826	7.39493	7.22764	7.22427		31000	7.62696	7.68714	7.64683	7.735	7.68014		31000	7.65895	7.57136	7.63901	7.54837	7.6165
	32000	7.53427	7.34379	7.33891	7.27734	7.26754		32000	7.53919	7.39684	7.38065	7.21699	7.20821		32000	7.61136	7.6656	7.61864	7.71241	7.65178		32000	7.65594	7.57364	7.64558	7.54859	7.61401
	33000	7.51611	7.32325	7.32501	7.2687	7.25729		33000	7.52094	7.38071	7.37023	7.20222	7.19704		33000	7.59784	7.63389	7.6057	7.68879	7.62646		33000	7.64311	7.57299	7.63976	7.54947	7.60936
	34000	7.49285	7.30871	7.31205	7.25743	7.23789		34000	7.4987	7.3659	7.35737	7.19252	7.18789		34000	7.57984	7.61365	7.59423	7.65883	7.60943		34000	7.62549	7.57152	7.62283	7.5474	7.60195
	35000	7.47025	7.29405	7.27923	7.24809	7.22554		35000	7.46978	7.35123	7.3413	7.18585	7.18086		35000	7.55736	7.60032	7.57702	7.63203	7.60143		35000	7.61355	7.56917	7.60871	7.54573	7.5857
	36000	7.45659	7.27972	7.25341	7.23739	7.21357		36000	7.4446	7.33758	7.32495	7.17733	7.16588		36000	7.5394	7.5911	7.56383	7.61864	7.58929		36000	7.60295	7.56644	7.59943	7.54578	7.56925
	37000	7.44479	7.26768	7.23044	7.22723	7.2007		37000	7.41611	7.32575	7.31334	7.16497	7.15197		37000	7.52401	7.57347	7.54739	7.60946	7.57078		37000	7.58229	7.56024	7.58556	7.54041	7.5569
	38000	7.43447	7.25631	7.21675	7.2176	7.18505		38000	7.39733	7.31588	7.29452	7.15736	7.14567		38000	7.51583	7.55562	7.52663	7.60041	7.55122		38000	7.56557	7.54586	7.57029	7.52869	7.54813
	39000	7.42262	7.24554	7.2084	7.2076	7.17495		39000	7.37925	7.30066	7.2726	7.14869	7.13942		39000	7.50332	7.53466	7.51303	7.58933	7.53038		39000	7.54685	7.46087	7.55156	7.51585	7.53974
	40000	7.40916	7.23286	7.20309	7.19949	7.16727		40000	7.35848	7.28266	7.25774	7.14554	7.13587		40000	7.49345	7.51698	7.4969	7.57359	7.51785		40000	7.53379	7.41745	7.53491	7.48875	7.53117
	41000	7.38035	7.20464	7.1829	7.16223	7.1477		41000	7.35129	7.26441	7.24547	7.13975	7.13134		41000	7.47886	7.49499	7.48318	7.55491	7.50373		41000	7.52311	7.37696	7.52157	7.47242	7.52019
	42000	7.34886	7.19564	7.17422	7.15019	7.13423		42000	7.3356	7.25268	7.23494	7.13573	7.12483		42000	7.4522	7.47873	7.46907	7.53894	7.48364		42000	7.51195	7.35076	7.50269	7.45508	7.50645
	43000	7.3235	7.18824	7.16535	7.14619	7.13078		43000	7.32086	7.24178	7.22542	7.12955	7.11607		43000	7.43014	7.45627	7.44785	7.52845	7.46118		43000	7.4908	7.32505	7.4796	7.44029	7.49018
	44000	7.31062	7.18134	7.15538	7.13926	7.12427		44000	7.30361	7.22929	7.21273	7.12162	7.10695		44000	7.42031	7.43207	7.42864	7.51827	7.43765		44000	7.47502	7.30775	7.46394	7.42382	7.46348
	45000	7.29952	7.17411	7.14814	7.13022	7.11804		45000	7.28681	7.21695	7.19831	7.11484	7.09995		45000	7.41533	7.41865	7.41765	7.5017	7.42636		45000	7.46569	7.29659	7.45004	7.40711	7.45348
	46000	7.28495	7.16335	7.14017	7.1195	7.10863		46000	7.26685	7.20619	7.1878	7.10925	7.09523		46000	7.41056	7.41322	7.40982	7.48706	7.42012		46000	7.44871	7.28555	7.43859	7.38547	7.44405
	47000	7.27225	7.15088	7.12989	7.11034	7.09823		47000	7.25818	7.19566	7.18152	7.09867	7.08832		47000	7.4026	7.40849	7.39612	7.46858	7.41462		47000	7.43568	7.27249	7.42851	7.3648	7.43045
	48000	7.25803	7.14172	7.11921	7.10104	7.08797		48000	7.24663	7.18558	7.17288	7.09011	7.07987		48000	7.39447	7.39844	7.38266	7.44228	7.40978		48000	7.42752	7.26503	7.41837	7.3546	7.41565
	April 2th sampling / 400 mg (slow-release urea) kg-1 (sediment)							April 16th sampling / 400 mg (slow-release urea) kg-1 (sediment)							April 30th sampling / 400 mg (slow-release urea) kg-1 (sediment)							May 14th sampling 400 mg (slow-release urea) kg-1 (sediment)
	Rhizosphere distance / mm Depth / μm	N1	N2	N3	N4	N5		Rhizosphere distance / mm Depth / μm	N1	N2	N3	N4	N5		Rhizosphere distance / mm Depth / μm	N1	N2	N3	N4	N5		Rhizosphere distance / mm Depth / μm	N1	N2	N3	N4	N5
	0	7.75665	7.58156	7.5759	7.58134	7.57746		0	7.02707	7.00358	7.36904	7.0852	7.8815		0	8.44086	8.66643	8.19226	8.23392	7.99978		0	7.73587	7.63098	7.60937	7.52524	7.52101
	1000	7.76857	7.58755	7.58557	7.58633	7.58256		1000	6.62033	7.0523	7.68372	7.29898	7.95336		1000	8.45014	8.66394	8.44708	8.24065	8.00683		1000	7.72227	7.61907	7.60469	7.54491	7.57722
	2000	7.76885	7.59234	7.59347	7.58973	7.58606		2000	7.0082	7.17117	7.63496	7.20579	7.98474		2000	8.46835	8.66942	8.45288	8.2692	8.00719		2000	7.7039	7.61106	7.59571	7.55932	7.59421
	3000	7.76718	7.5926	7.60054	7.5931	7.58805		3000	6.62578	7.38923	7.71415	7.491	8.02546		3000	8.45313	8.67561	8.46421	8.2913	8.00562		3000	7.71107	7.62415	7.60779	7.56961	7.60962
	4000	7.76577	7.59302	7.60129	7.59564	7.59008		4000	6.74363	7.15028	7.60116	7.26301	8.05369		4000	8.45682	8.68194	8.47145	8.32475	8.007		4000	7.71586	7.63545	7.6177	7.63719	7.65241
	5000	7.76233	7.59301	7.59868	7.59862	7.59148		5000	6.74635	7.03869	7.92433	7.76829	8.07847		5000	8.45683	8.68438	8.4854	8.34636	8.01017		5000	7.71449	7.6414	7.62991	7.68494	7.68319
	6000	7.75532	7.59159	7.5958	7.60002	7.59174		6000	6.74601	6.90477	7.9855	7.87766	8.10794		6000	8.45435	8.68608	8.50912	8.36395	8.01517		6000	7.71686	7.64777	7.63369	7.6968	7.67971
	7000	7.74896	7.59049	7.59325	7.60018	7.59355		7000	6.99116	7.15157	7.96773	7.88451	8.13892		7000	8.44769	8.68722	8.54248	8.36909	8.02475		7000	7.71837	7.656	7.64013	7.69743	7.66893
	8000	7.74542	7.58972	7.59145	7.60569	7.59422		8000	7.19659	7.20355	7.60186	7.89397	8.15109		8000	8.42248	8.6863	8.53707	8.36614	8.02969		8000	7.71748	7.65177	7.63588	7.70001	7.63763
	9000	7.74495	7.58959	7.59031	7.60958	7.59429		9000	7.44281	7.15694	7.54549	7.9033	8.12803		9000	8.36386	8.62423	8.41001	8.30361	8.01931		9000	7.71469	7.64915	7.628	7.69271	7.63737
	10000	7.74507	7.59027	7.58947	7.60949	7.5943		10000	6.71035	7.2806	7.58966	7.89553	8.07246		10000	8.2701	8.45008	8.25443	8.22219	8.00792		10000	7.71339	7.64927	7.61101	7.68988	7.62017
	11000	7.73651	7.58874	7.59037	7.61198	7.60017		11000	7.00511	7.29751	7.73954	7.87005	8.04813		11000	8.2176	8.35145	8.14608	8.17125	8.00978		11000	7.71215	7.64465	7.60682	7.67522	7.60963
	12000	7.7335	7.59089	7.58876	7.60331	7.59624		12000	6.75849	7.34696	7.89896	7.86914	8.04092		12000	8.17889	8.29941	8.11126	8.13822	8.00735		12000	7.70741	7.64095	7.60295	7.67312	7.60124
	13000	7.73178	7.59133	7.58881	7.59807	7.59749		13000	7.55324	7.36361	7.59036	7.87934	8.03424		13000	8.13981	8.2575	8.06962	8.10801	7.99927		13000	7.70212	7.63503	7.6054	7.66045	7.60219
	14000	7.73686	7.59212	7.59032	7.59629	7.59628		14000	7.6042	7.45167	7.69174	7.89165	8.03411		14000	8.10942	8.20589	8.04628	8.08628	7.9871		14000	7.70071	7.62433	7.60218	7.65126	7.60107
	15000	7.73679	7.58677	7.58721	7.59335	7.59331		15000	7.20913	7.18458	7.75414	7.90407	8.02804		15000	8.07775	8.14282	8.03023	8.06764	7.96859		15000	7.69747	7.6202	7.5982	7.64814	7.5918
	16000	7.72841	7.56742	7.57465	7.59043	7.58524		16000	7.585	7.21304	7.49505	7.90402	8.0137		16000	8.02473	8.10845	8.01042	8.05254	7.92974		16000	7.69684	7.62031	7.59737	7.64904	7.58335
	17000	7.69881	7.53472	7.54965	7.57714	7.57617		17000	7.65291	7.48083	7.23128	7.89003	8.0055		17000	7.97436	8.05665	7.97928	8.02899	7.89931		17000	7.69569	7.62217	7.5945	7.64792	7.58488
	18000	7.66489	7.51279	7.52848	7.55416	7.56116		18000	7.61464	7.25005	7.24354	7.86207	7.98498		18000	7.90519	8.01602	7.93329	7.99737	7.88091		18000	7.69263	7.61993	7.59204	7.63829	7.59262
	19000	7.65592	7.49653	7.51193	7.5326	7.54618		19000	7.45371	7.14815	7.24874	7.83681	7.96554		19000	7.87857	7.98697	7.90257	7.97366	7.86495		19000	7.68852	7.61697	7.587	7.64461	7.59321
	20000	7.63564	7.47715	7.49855	7.5146	7.53155		20000	7.42988	7.19585	7.12866	7.82413	7.95342		20000	7.83735	7.96439	7.88678	7.9482	7.84853		20000	7.68634	7.60897	7.5827	7.63982	7.59166
	21000	7.62466	7.48817	7.50017	7.51824	7.54302		21000	7.40136	7.20628	7.02369	7.81184	7.94069		21000	7.80223	7.90274	7.87091	7.92212	7.83268		21000	7.68716	7.60486	7.58864	7.63997	7.58769
	22000	7.63135	7.47186	7.4864	7.50685	7.52705		22000	7.56727	7.04863	6.62277	7.78952	7.92676		22000	7.78208	7.88772	7.86109	7.90763	7.8202		22000	7.68211	7.60739	7.59131	7.64312	7.5827
	23000	7.63789	7.48961	7.50142	7.51421	7.52748		23000	7.45681	7.13332	6.80061	7.77346	7.91497		23000	7.7498	7.87969	7.84727	7.89186	7.81247		23000	7.67934	7.61634	7.58618	7.64814	7.5846
	24000	7.64867	7.51585	7.5186	7.52931	7.53456		24000	7.73048	7.19727	7.02258	7.76231	7.9031		24000	7.71926	7.871	7.8354	7.88115	7.80576		24000	7.67914	7.62337	7.57607	7.65171	7.5774
	25000	7.65641	7.54137	7.53904	7.54407	7.54352		25000	7.87847	7.2189	7.03979	7.75586	7.88948		25000	7.69729	7.85541	7.82608	7.87021	7.80111		25000	7.67059	7.62538	7.58019	7.6488	7.5758
	26000	7.66394	7.56165	7.5573	7.55595	7.55427		26000	7.85459	7.47315	7.01431	7.75149	7.8795		26000	7.67767	7.84728	7.81747	7.86238	7.7949		26000	7.66631	7.62307	7.59093	7.65084	7.57552
	27000	7.67158	7.58133	7.56836	7.56519	7.56355		27000	7.85233	7.44151	6.85942	7.74574	7.86625		27000	7.66462	7.83837	7.8085	7.85451	7.78894		27000	7.6669	7.62029	7.59521	7.64592	7.57381
	28000	7.67484	7.58532	7.57492	7.57169	7.57234		28000	7.80369	7.22005	6.7711	7.74062	7.85109		28000	7.65304	7.83271	7.80044	7.84581	7.78238		28000	7.66278	7.61844	7.59185	7.62771	7.57181
	29000	7.67492	7.58954	7.5784	7.57541	7.57562		29000	7.40829	7.27794	6.81167	7.73764	7.84141		29000	7.64284	7.82616	7.79451	7.83501	7.77462		29000	7.66088	7.61353	7.58682	7.61639	7.56835
	30000	7.67456	7.5941	7.58041	7.57759	7.5775		30000	7.46186	7.23641	7.22019	7.73641	7.83546		30000	7.63367	7.82206	7.7849	7.82827	7.76572		30000	7.65707	7.61303	7.5863	7.61761	7.56318
	31000	7.66596	7.59129	7.58194	7.58101	7.57904		31000	7.43023	7.07629	6.79994	7.72625	7.83144		31000	7.62562	7.80823	7.77891	7.82026	7.75882		31000	7.64894	7.60853	7.58809	7.61337	7.56246
	32000	7.66544	7.59139	7.58207	7.58236	7.58034		32000	7.57928	7.23468	6.70311	7.71282	7.82879		32000	7.61741	7.79786	7.76847	7.81302	7.75026		32000	7.64615	7.60597	7.58201	7.61664	7.5662
	33000	7.66343	7.59207	7.58327	7.58372	7.58102		33000	7.57273	6.94419	6.77273	7.69993	7.8214		33000	7.61159	7.78934	7.76004	7.80432	7.74469		33000	7.64493	7.60194	7.57885	7.61554	7.56193
	34000	7.66186	7.59293	7.58345	7.58447	7.58175		34000	7.72906	6.93179	6.75963	7.68963	7.81152		34000	7.60693	7.77454	7.75327	7.76926	7.74062		34000	7.64284	7.60105	7.57171	7.61407	7.5574
	35000	7.6607	7.59351	7.58322	7.58437	7.58156		35000	7.61337	6.98881	6.49645	7.6824	7.80232		35000	7.60194	7.75886	7.74359	7.75458	7.73383		35000	7.64125	7.60279	7.56928	7.61026	7.55198
	36000	7.65986	7.59346	7.58339	7.58373	7.58145		36000	7.45965	6.98283	6.63079	7.67734	7.79547		36000	7.59712	7.74723	7.73083	7.74445	7.72831		36000	7.63901	7.59955	7.56411	7.60829	7.55418
	37000	7.65835	7.59652	7.58336	7.58378	7.5816		37000	7.4313	6.97674	6.68738	7.67531	7.79155		37000	7.58797	7.73853	7.72189	7.73217	7.72462		37000	7.63359	7.59635	7.55525	7.61189	7.54987
	38000	7.65466	7.60019	7.58378	7.58296	7.58147		38000	7.61031	7.0241	6.67762	7.6734	7.78756		38000	7.5805	7.73381	7.71669	7.72542	7.71881		38000	7.63012	7.58779	7.55059	7.60715	7.55129
	39000	7.65076	7.60244	7.58439	7.58413	7.58121		39000	7.80013	7.00428	6.61771	7.67088	7.78364		39000	7.56893	7.7256	7.7107	7.72135	7.71248		39000	7.62358	7.57174	7.54826	7.60336	7.5493
	40000	7.64897	7.605	7.58497	7.58566	7.5819		40000	6.94389	6.9264	6.67519	7.66853	7.77813		40000	7.55706	7.71111	7.69765	7.71978	7.7052		40000	7.61584	7.57024	7.54614	7.59903	7.5441
	41000	7.64316	7.58915	7.58327	7.58569	7.5829		41000	6.56777	7.3088	6.67878	7.66653	7.77452		41000	7.54669	7.69579	7.68826	7.69215	7.69651		41000	7.60709	7.5685	7.54821	7.59426	7.53954
	42000	7.642	7.59017	7.58427	7.58774	7.58467		42000	7.41964	7.05534	6.84566	7.66491	7.77157		42000	7.53635	7.68284	7.67969	7.68875	7.68518		42000	7.59456	7.56219	7.5462	7.59016	7.53655
	43000	7.64463	7.59259	7.58528	7.59117	7.58609		43000	7.58883	7.0736	6.53345	7.66307	7.76888		43000	7.5298	7.67304	7.67444	7.68312	7.6772		43000	7.57954	7.56165	7.54142	7.58324	7.52743
	44000	7.64715	7.59625	7.58607	7.59246	7.58841		44000	7.52142	7.00237	6.45105	7.66102	7.76561		44000	7.52659	7.66563	7.66394	7.66549	7.67253		44000	7.57233	7.55519	7.53385	7.57822	7.52111
	45000	7.648	7.60067	7.58622	7.59359	7.58981		45000	7.33887	6.77689	6.24885	7.65871	7.761		45000	7.52109	7.65307	7.64775	7.65312	7.66559		45000	7.56339	7.55557	7.53313	7.5689	7.51501
	46000	7.64774	7.60272	7.59355	7.59548	7.59135		46000	7.32149	7.00352	6.23143	7.65576	7.75795		46000	7.51596	7.64141	7.63377	7.64312	7.65826		46000	7.55843	7.55339	7.52682	7.56476	7.51324
	47000	7.64791	7.60262	7.59824	7.59739	7.59071		47000	7.02301	7.30182	6.46411	7.65377	7.75519		47000	7.50964	7.63342	7.62627	7.63466	7.64941		47000	7.5536	7.54992	7.51894	7.56212	7.50862
	48000	7.64761	7.60351	7.60204	7.59417	7.59012		48000	7.71962	7.24107	6.45514	7.65015	7.75371		48000	7.50549	7.61641	7.62094	7.62312	7.63921		48000	7.5514	7.54387	7.50991	7.55576	7.50054
	April 2th sampling / 600 mg (slow-release urea) kg-1 (sediment)							April 16th sampling / 600 mg (slow-release urea) kg-1 (sediment)							April 30th sampling / 600 mg (slow-release urea) kg-1 (sediment)							May 14th sampling 600 mg (slow-release urea) kg-1 (sediment)
	Rhizosphere distance / mm Depth / μm	N1	N2	N3	N4	N5		Rhizosphere distance / mm Depth / μm	N1	N2	N3	N4	N5		Rhizosphere distance / mm Depth / μm	N1	N2	N3	N4	N5		Rhizosphere distance / mm Depth / μm	N1	N2	N3	N4	N5
	0	7.761	7.51635	7.56431	7.55322	7.55204		0	7.95932	7.59333	7.53005	7.61465	7.45972		0	7.92736	8.03267	8.07164	8.04817	7.87843		0	6.6368	7.48452	7.46409	7.54996	7.34987
	1000	7.75321	7.52338	7.56555	7.5558	7.55738		1000	7.95877	7.59499	7.5346	7.62827	7.47948		1000	7.92617	8.04631	8.08239	8.03967	7.88309		1000	6.6342	7.5511	7.5315	7.59722	7.43263
	2000	7.74233	7.53161	7.57477	7.56248	7.5628		2000	7.96178	7.60488	7.54025	7.64145	7.49155		2000	7.91216	8.04442	8.06487	8.03313	7.88801		2000	6.80419	7.59248	7.57274	7.64537	7.53482
	3000	7.73011	7.53569	7.58048	7.56709	7.57298		3000	7.9532	7.6102	7.54372	7.64816	7.49861		3000	7.91788	8.06665	8.01983	8.01035	7.90845		3000	7.04467	7.63225	7.62785	7.7154	7.62228
	4000	7.71113	7.53853	7.58249	7.57164	7.57573		4000	7.9418	7.61102	7.54581	7.64835	7.50225		4000	7.91341	8.09306	8.00226	7.99413	7.91561		4000	7.29074	7.68008	7.66198	7.73697	7.67135
	5000	7.68609	7.53737	7.5826	7.56831	7.57675		5000	7.92775	7.607	7.54699	7.63547	7.5029		5000	7.90077	8.08827	7.99031	7.98305	7.91811		5000	7.38097	7.7114	7.67057	7.75074	7.70337
	6000	7.65198	7.53116	7.57568	7.56199	7.57337		6000	7.91427	7.60392	7.5452	7.60652	7.49571		6000	7.88314	8.06671	7.98163	7.96888	7.92084		6000	7.47523	7.73479	7.69204	7.76345	7.7189
	7000	7.6064	7.52812	7.5622	7.56009	7.56789		7000	7.89237	7.59901	7.54073	7.55486	7.49538		7000	7.86321	8.0533	7.97209	7.95346	7.91443		7000	7.53311	7.7611	7.71709	7.77392	7.72412
	8000	7.57597	7.5304	7.55787	7.55842	7.56371		8000	7.87538	7.55371	7.53978	7.55058	7.49409		8000	7.84098	8.02558	7.96011	7.923	7.90904		8000	7.55849	7.7731	7.73748	7.77627	7.72823
	9000	7.5658	7.52956	7.55736	7.55635	7.56208		9000	7.87154	7.55279	7.54427	7.55076	7.50149		9000	7.82938	8.00478	7.94244	7.91164	7.90557		9000	7.58715	7.77269	7.75819	7.76887	7.72885
	10000	7.55113	7.52595	7.55577	7.55149	7.56171		10000	7.88788	7.55797	7.54452	7.5703	7.5145		10000	7.81625	7.98203	7.92441	7.89548	7.89736		10000	7.60784	7.76679	7.77376	7.75926	7.72785
	11000	7.53938	7.51808	7.55586	7.5567	7.56247		11000	7.88605	7.56147	7.54301	7.58866	7.51759		11000	7.80629	7.96134	7.9041	7.87511	7.89057		11000	7.61801	7.75386	7.79185	7.75309	7.72884
	12000	7.51869	7.51268	7.551	7.54836	7.55659		12000	7.8698	7.5627	7.54143	7.58741	7.51725		12000	7.79922	7.94459	7.88497	7.85598	7.87264		12000	7.62029	7.73973	7.81153	7.75259	7.72829
	13000	7.5006	7.50762	7.54773	7.5454	7.55254		13000	7.85189	7.56056	7.54057	7.58764	7.51744		13000	7.78672	7.92327	7.87254	7.83399	7.84982		13000	7.6281	7.73233	7.82774	7.75269	7.72887
	14000	7.48388	7.50481	7.54546	7.54384	7.55105		14000	7.83941	7.55938	7.53997	7.58423	7.51472		14000	7.76594	7.91276	7.85577	7.81661	7.8183		14000	7.63144	7.7303	7.82903	7.75496	7.73053
	15000	7.47244	7.50311	7.54507	7.54247	7.55123		15000	7.82971	7.55705	7.53818	7.58045	7.51374		15000	7.74635	7.9009	7.84947	7.80824	7.80129		15000	7.63518	7.72837	7.82841	7.74805	7.73094
	16000	7.4673	7.50345	7.54403	7.54237	7.55236		16000	7.81591	7.55438	7.53702	7.5763	7.51504		16000	7.73232	7.88598	7.8353	7.80513	7.79685		16000	7.6385	7.72536	7.8271	7.74345	7.73178
	17000	7.4692	7.50448	7.54518	7.54275	7.55232		17000	7.79564	7.55266	7.53243	7.57227	7.51399		17000	7.72356	7.86961	7.81871	7.79741	7.79652		17000	7.64106	7.72887	7.83023	7.73983	7.72878
	18000	7.47206	7.50574	7.54475	7.54228	7.55111		18000	7.77499	7.54975	7.52765	7.56523	7.51146		18000	7.71362	7.85189	7.81172	7.79343	7.78878		18000	7.64819	7.7255	7.83053	7.73558	7.72905
	19000	7.47369	7.50353	7.54362	7.53808	7.54527		19000	7.7459	7.54807	7.52603	7.55318	7.50714		19000	7.70624	7.83731	7.80324	7.78809	7.7767		19000	7.62706	7.72216	7.8331	7.73355	7.72396
	20000	7.47333	7.49576	7.53751	7.53095	7.53919		20000	7.7033	7.54622	7.52418	7.5464	7.50149		20000	7.69584	7.82494	7.79844	7.78714	7.7703		20000	7.61807	7.72354	7.81519	7.73451	7.72167
	21000	7.46063	7.48033	7.5417	7.5228	7.53392		21000	7.66661	7.54494	7.52235	7.54497	7.49009		21000	7.68942	7.81102	7.79321	7.7891	7.7648		21000	7.60952	7.7228	7.78852	7.7334	7.7182
	22000	7.45944	7.48315	7.53544	7.52012	7.53961		22000	7.64585	7.54405	7.51715	7.54192	7.48202		22000	7.68371	7.80173	7.7875	7.78404	7.75297		22000	7.60778	7.7206	7.76001	7.7314	7.71322
	23000	7.45687	7.49033	7.53196	7.52327	7.5442		23000	7.63354	7.54303	7.51295	7.53653	7.47182		23000	7.67473	7.79548	7.77606	7.77774	7.74029		23000	7.61481	7.71948	7.74298	7.72987	7.713
	24000	7.45168	7.4918	7.52913	7.52839	7.54323		24000	7.62278	7.54183	7.51171	7.51923	7.46452		24000	7.66642	7.7875	7.76986	7.76285	7.72929		24000	7.60806	7.71037	7.7351	7.72398	7.7136
	25000	7.45438	7.49144	7.5301	7.52906	7.54108		25000	7.6117	7.53952	7.50653	7.51003	7.45816		25000	7.65991	7.77917	7.76823	7.74918	7.72356		25000	7.60004	7.70935	7.73178	7.71693	7.71199
	26000	7.45656	7.49	7.53208	7.53071	7.54107		26000	7.60382	7.53488	7.5026	7.50428	7.45576		26000	7.64975	7.77145	7.76236	7.74107	7.72016		26000	7.60015	7.70333	7.72852	7.71546	7.71096
	27000	7.45703	7.49076	7.53292	7.53082	7.53988		27000	7.59794	7.52961	7.49582	7.50193	7.45324		27000	7.64227	7.76569	7.7554	7.73731	7.71498		27000	7.60097	7.70047	7.72867	7.71722	7.71104
	28000	7.45653	7.4886	7.53859	7.52753	7.53944		28000	7.58866	7.5242	7.48958	7.49804	7.44656		28000	7.63798	7.76154	7.74466	7.72738	7.70791		28000	7.58952	7.70194	7.72822	7.71797	7.70651
	29000	7.45611	7.48537	7.53739	7.52501	7.53959		29000	7.5817	7.51887	7.48326	7.49504	7.44227		29000	7.63197	7.75426	7.73143	7.71879	7.69802		29000	7.586	7.69914	7.72609	7.71371	7.70294
	30000	7.45371	7.48461	7.53485	7.52149	7.53899		30000	7.57277	7.51339	7.47693	7.49075	7.43977		30000	7.62671	7.74787	7.7215	7.70557	7.68451		30000	7.58226	7.68522	7.7251	7.71091	7.70354
	31000	7.45051	7.48716	7.53088	7.52145	7.53365		31000	7.5615	7.50605	7.47256	7.48302	7.4309		31000	7.62013	7.74436	7.71552	7.69761	7.67961		31000	7.58185	7.68046	7.72327	7.70561	7.70245
	32000	7.45331	7.49102	7.53135	7.52129	7.53693		32000	7.55342	7.49897	7.46376	7.47578	7.4204		32000	7.61399	7.73939	7.71233	7.70019	7.67166		32000	7.58122	7.68958	7.71731	7.7031	7.69831
	33000	7.45535	7.49025	7.52877	7.52047	7.53764		33000	7.54755	7.4895	7.45813	7.47276	7.41995		33000	7.61297	7.73023	7.70481	7.69451	7.66866		33000	7.57506	7.68653	7.71412	7.70032	7.69801
	34000	7.45711	7.4896	7.52688	7.52031	7.53499		34000	7.54517	7.4775	7.45252	7.47062	7.42998		34000	7.61047	7.72157	7.69323	7.69275	7.66525		34000	7.57282	7.67302	7.71475	7.69389	7.6922
	35000	7.45645	7.48857	7.5251	7.51785	7.53279		35000	7.54022	7.46728	7.44847	7.46583	7.437		35000	7.60776	7.71754	7.6841	7.68304	7.66027		35000	7.57457	7.67249	7.70747	7.69242	7.68787
	36000	7.45589	7.49097	7.52234	7.5168	7.53151		36000	7.53458	7.4592	7.4442	7.4603	7.42758		36000	7.60543	7.71195	7.6797	7.67392	7.65146		36000	7.57567	7.66825	7.70111	7.68898	7.68312
	37000	7.45409	7.49175	7.52065	7.51584	7.52994		37000	7.52662	7.45501	7.44233	7.45622	7.42483		37000	7.60396	7.70527	7.6754	7.67105	7.64302		37000	7.57612	7.66922	7.69381	7.68514	7.67838
	38000	7.4547	7.49235	7.51876	7.5144	7.52892		38000	7.51619	7.4486	7.44453	7.4525	7.42092		38000	7.60144	7.70331	7.66958	7.66592	7.63791		38000	7.56666	7.66384	7.69169	7.6898	7.67536
	39000	7.45455	7.49276	7.518	7.51206	7.5276		39000	7.50628	7.44186	7.44122	7.44929	7.4173		39000	7.60028	7.69934	7.66504	7.66148	7.63261		39000	7.56418	7.65812	7.68618	7.68437	7.66748
	40000	7.45506	7.49364	7.51607	7.5117	7.52678		40000	7.50507	7.43841	7.43724	7.44297	7.4142		40000	7.59912	7.68972	7.65717	7.65887	7.62505		40000	7.55834	7.6575	7.68639	7.67991	7.66385
	41000	7.45197	7.49819	7.51394	7.51583	7.52477		41000	7.50601	7.43412	7.43068	7.43719	7.41218		41000	7.59725	7.67943	7.64965	7.6555	7.62376		41000	7.56094	7.65308	7.6822	7.68124	7.66142
	42000	7.45332	7.49835	7.51396	7.51428	7.52463		42000	7.50058	7.43022	7.42718	7.43096	7.40969		42000	7.59278	7.68056	7.64458	7.64715	7.61983		42000	7.56183	7.65065	7.67028	7.67574	7.65706
	43000	7.45329	7.49935	7.51223	7.51193	7.52332		43000	7.49417	7.4244	7.42259	7.42723	7.40734		43000	7.58904	7.67735	7.63759	7.63768	7.61816		43000	7.55312	7.65014	7.66633	7.6707	7.64992
	44000	7.45331	7.49842	7.5099	7.5096	7.52266		44000	7.48207	7.41902	7.41931	7.42156	7.40304		44000	7.58585	7.6698	7.63647	7.6335	7.61346		44000	7.55046	7.64727	7.66008	7.66079	7.63541
	45000	7.45331	7.49829	7.50754	7.50788	7.52085		45000	7.4739	7.41458	7.41388	7.41613	7.39848		45000	7.57972	7.67073	7.63086	7.62921	7.60989		45000	7.54963	7.63522	7.65325	7.65243	7.63203
	46000	7.45293	7.49787	7.50585	7.50669	7.51928		46000	7.46833	7.40948	7.41068	7.41195	7.39623		46000	7.57739	7.66454	7.62761	7.63119	7.60569		46000	7.54829	7.63119	7.65218	7.64357	7.6303
	47000	7.45272	7.49708	7.5031	7.50587	7.51725		47000	7.46488	7.40628	7.40572	7.40846	7.39387		47000	7.57206	7.6623	7.62586	7.62415	7.60382		47000	7.54523	7.6246	7.64693	7.64089	7.62272
	48000	7.45236	7.49539	7.50018	7.50405	7.51546		48000	7.46022	7.4011	7.40145	7.40369	7.39234		48000	7.569	7.64913	7.62014	7.6155	7.60083		48000	7.54558	7.61473	7.64608	7.63349	7.61822
